# Supplementary material for: WormPaths: Caenorhabditis elegans metabolic pathway annotation and visualization
Source: PubMed Central journal article supplement — bioRxiv. 2020 Dec 23:2020.12.22.424026. Preprint. [Version 1] doi: 10.1101/2020.12.22.424026 (PMC7781331; doi:10.1101/2020.12.22.424026), 2020-12-23

590 **Supporting information**

591 **Figure S1. An example of using WormPaths to search for a specific gene**

592 A search for the gene *metr-1* will lead to the gene overview, followed by the specific  
593 pathway maps that *metr-1* is involved in.

594

595 **Figure S2. Template used for drawing WormPaths maps**

596 GPR, gene-protein reaction association

597

598 **Figure S3. Formatting annotations and other design information for WormPaths**  
599 **maps**

600 GPR, gene-protein reaction association

601

602 **Figure S4. Tissue-specific expression of *pck-1* and *pck-2***

603

604 **Table S1. Pathways at levels 1 through 4**

605

606 **Table S2. All maps and the corresponding level to which each map was drawn**

607

608 **Table S3. Gene sets per each pathway by level by gene name**

609

610 **Table S4. Gene sets per each pathway by level by WormBase ID**

611

612 **Table S5. All pathway associations listed by gene**

# WormFlux

## WormPaths

**Network**

**Biomass**

**WormPaths**

**FBA**

Select from list

None selected

Bring pathway

Or search wormflux and use the WormPaths links in overview tables.

(?)

metr-1

for a gene

### Gene Overview

Name ..... : **metr-1**

Sequence ID ..... : R03D7.1

Status (?) ..... : Curated

KO (?) ..... : K00548

Enzymes in the model (?) ..... : 2.1.1.13

Other enzymes (?) ..... : None

Model reactions (?) ..... : RC00946

Other reactions (?) ..... : R09365

**In WormPaths (?)** ..... : [Folate cycle](#), [Methionine / S-adenosylmethionine cycle](#)

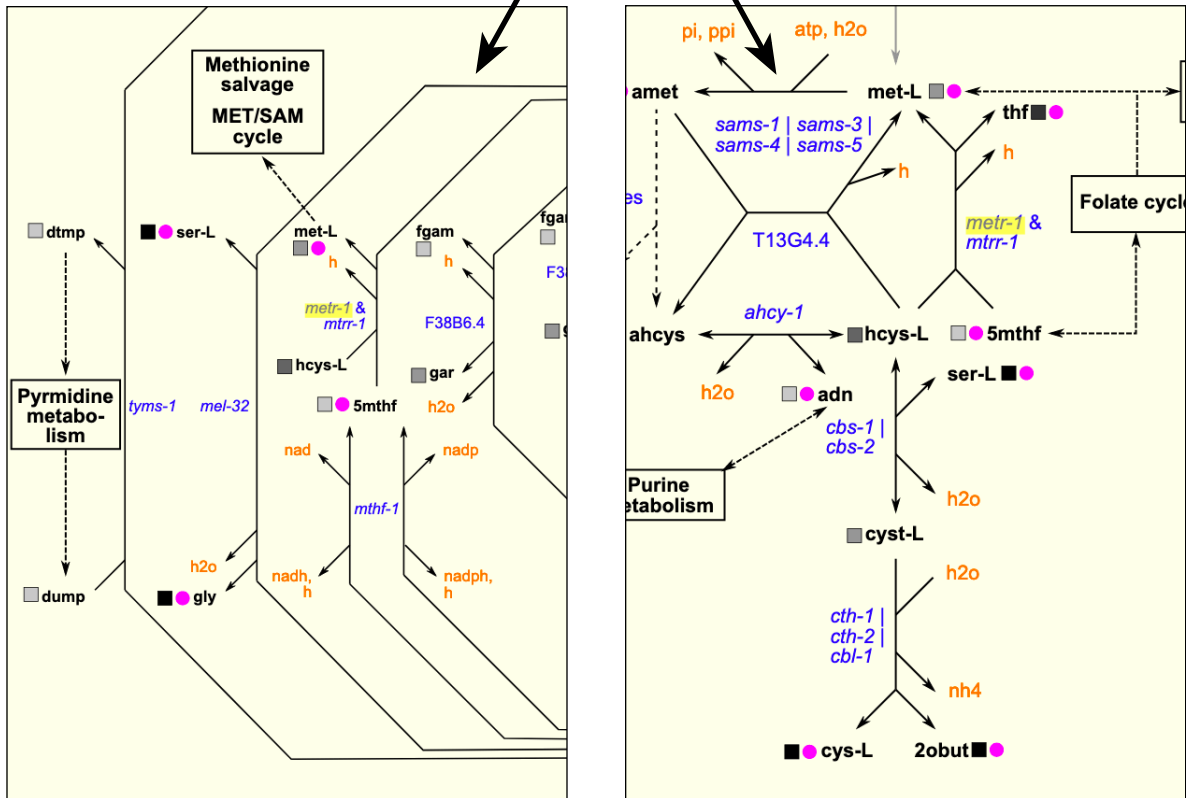

## Irreversible Reactions

| Edge                                                                                | #reactants | #products | side metabolites |
|-------------------------------------------------------------------------------------|------------|-----------|------------------|
|    | 1          | 1         | No               |
|    | 1          | 1         | Yes              |
|    | 2          | 2         | No               |
|    | 2          | 1         | No               |
|    | 1          | 2         | No               |
|    | 2          | 2         | Yes              |
|   | 2          | 1         | Yes              |
|  | 1          | 2         | Yes              |

## Reversible Reactions

| Edge                                                                                 | #reactants | #products | side metabolites |
|--------------------------------------------------------------------------------------|------------|-----------|------------------|
|    | 1          | 1         | No               |
|    | 1          | 1         | Yes              |
|    | 2          | 2         | No               |
|    | 2          | 1         | No               |
|    | 1          | 2         | No               |
|    | 2          | 2         | Yes              |
|   | 2          | 1         | Yes              |
|  | 1          | 2         | Yes              |

## Main Metabolites

accoa  
akg  
cys-L  
.  
.  
.  
.

## Co-reactants

adp      gdp  
amp      gtp  
atp      h  
co2      h2o  
coa      nad  
crn      nadh  
etfox    nadp  
etfrd    nadph  
fad      o2  
fadh2    pi  
          ppi

## GPR

acd-1  
idh-1 | idh-2  
suc1-1 | suc1-2 & suca-1  
.  
.  
.  
.

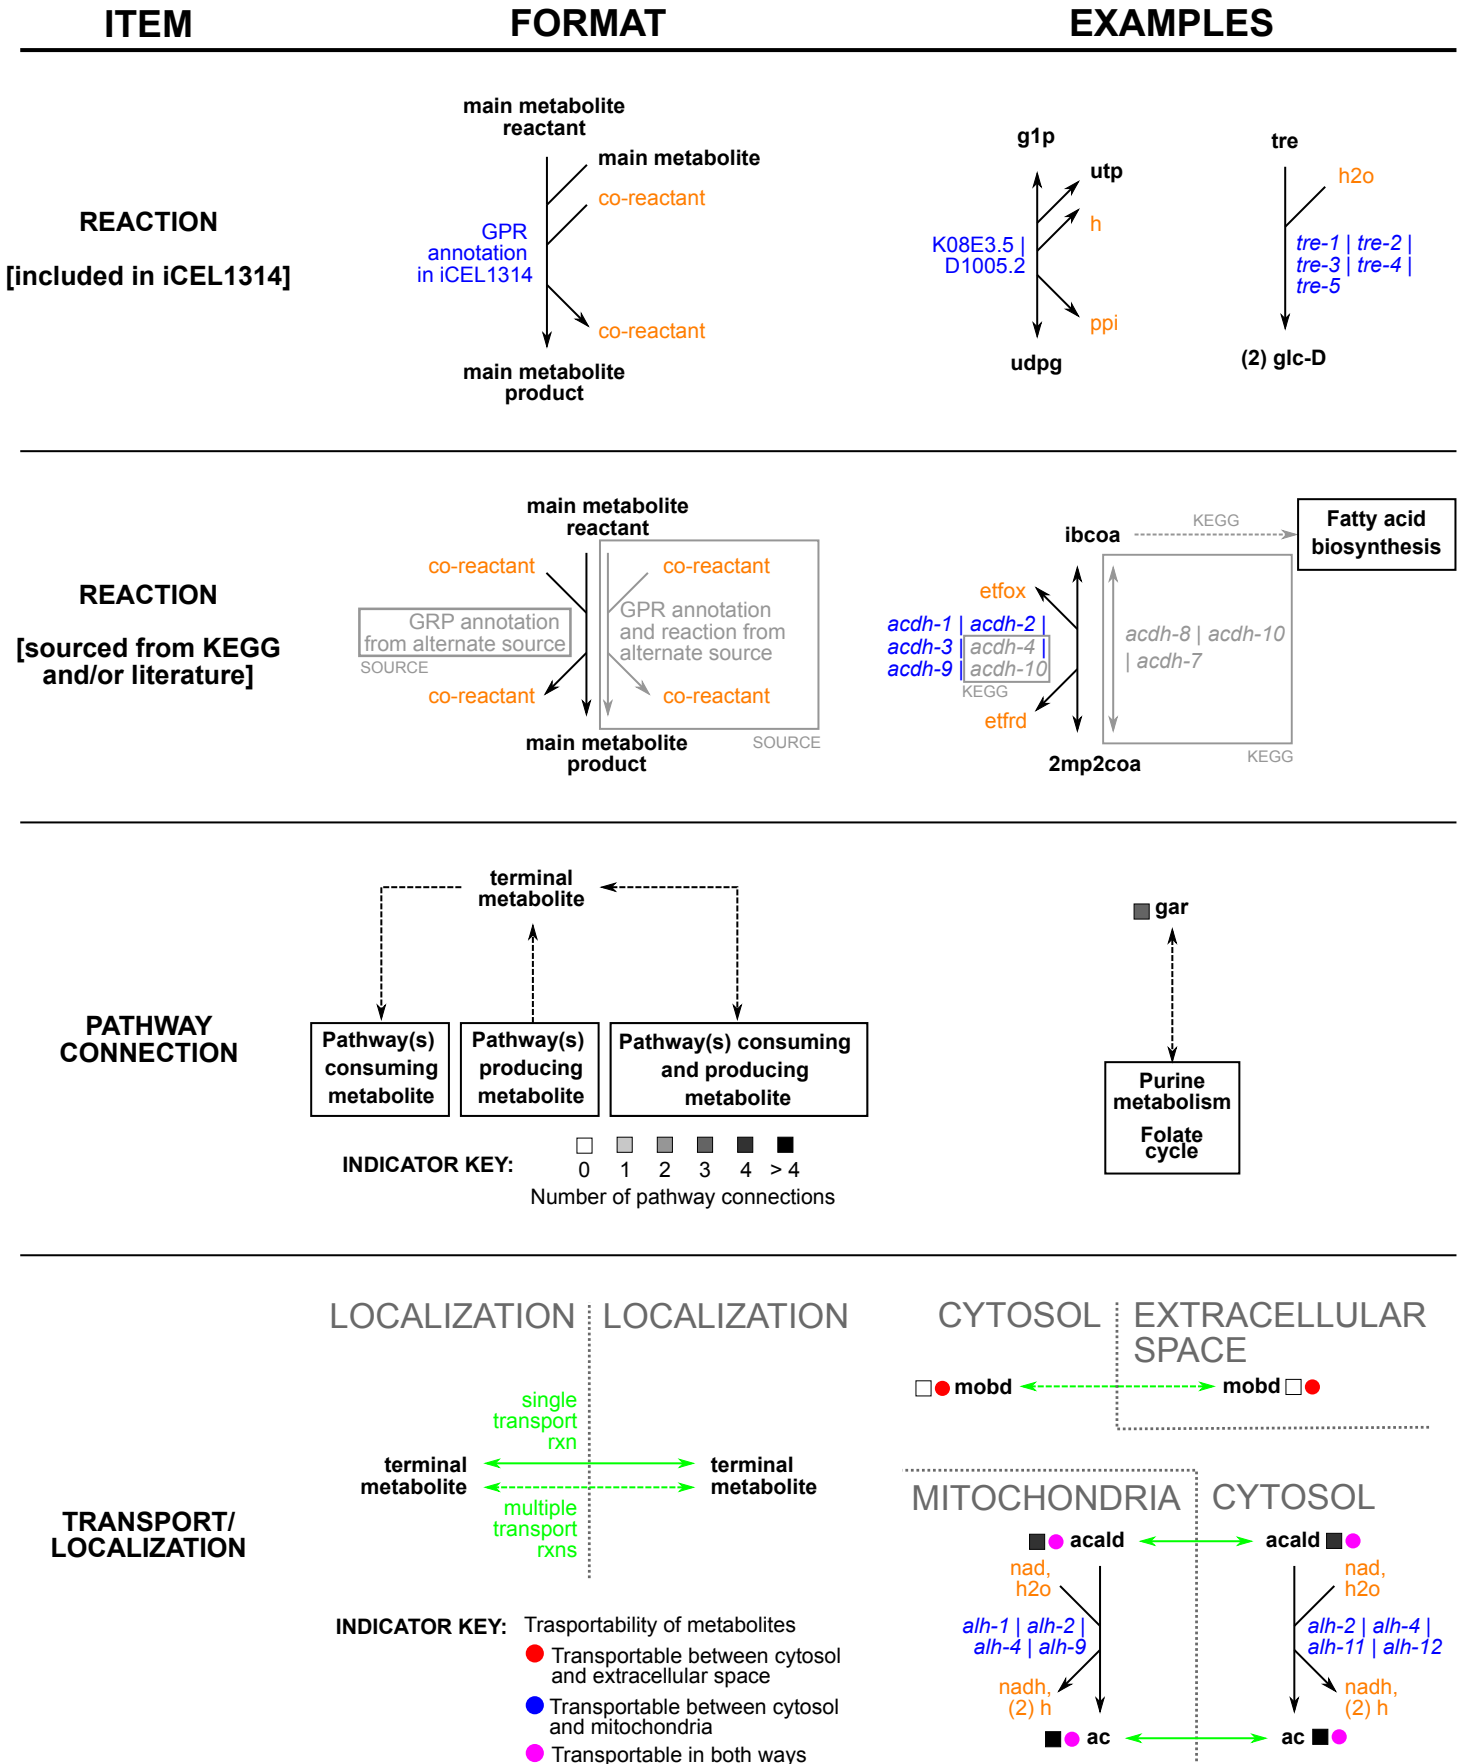

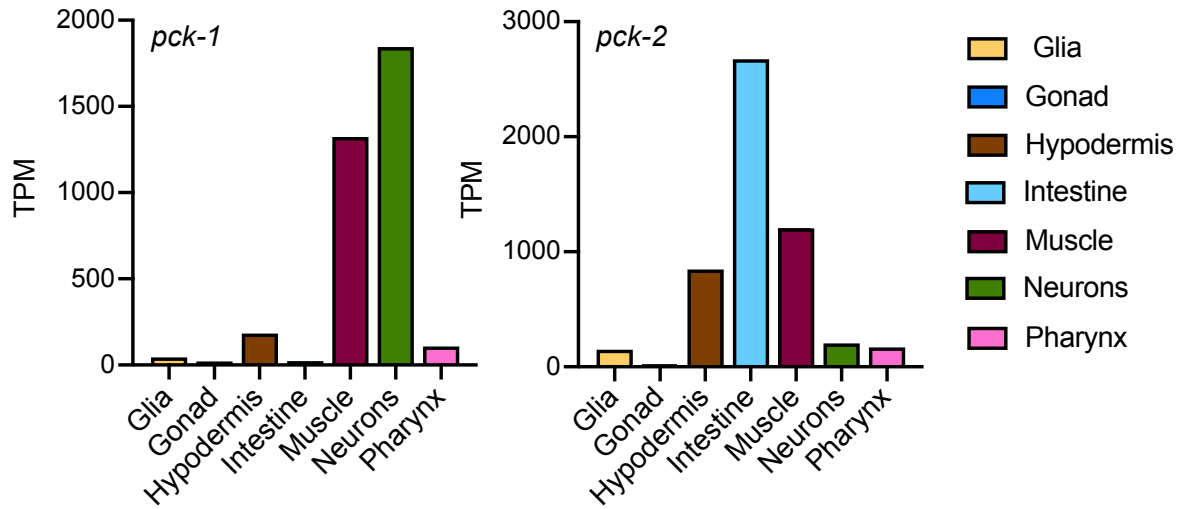

Supplement: NIHPP2020.12.22.424026-supplement-1.pdf [file NIHPP2020.12.22.424026-supplement-1.pdf]
